# Supplementary material
Source: ML conference proceedings conference paper supplement (https://openreview.net/forum?id=E1dANKwo4I)
Supplement: supplementary_material [file posterior_contour.pdf › self-consistency-real-main-2/experiments/multivariate_normal/parameter_dimensionality/plots/posterior_contour.pdf]

dimension 2

$\mu_{\text{obs}}=0$

$\mu_{\text{obs}}=1$

$\mu_{\text{obs}}=2$

$\mu_{\text{obs}}=3$

$\mu_{\text{obs}}=5$

$\mu_{\text{obs}}=8$

$\mu_{\text{obs}}=11$

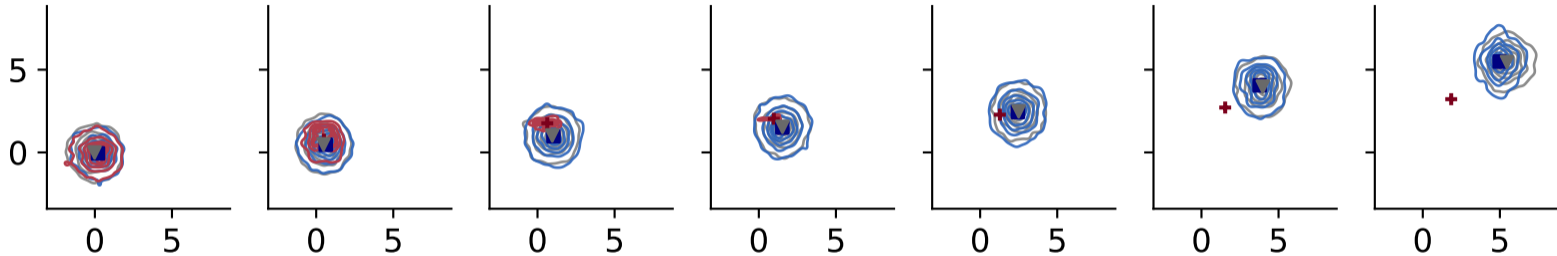

dimension 1

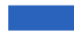

NPE + SC

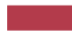

NPE only

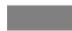

reference
