# Supplementary material
Source: ML conference proceedings conference paper supplement (https://openreview.net/forum?id=E1dANKwo4I)

# Mean of the unlabeled training data

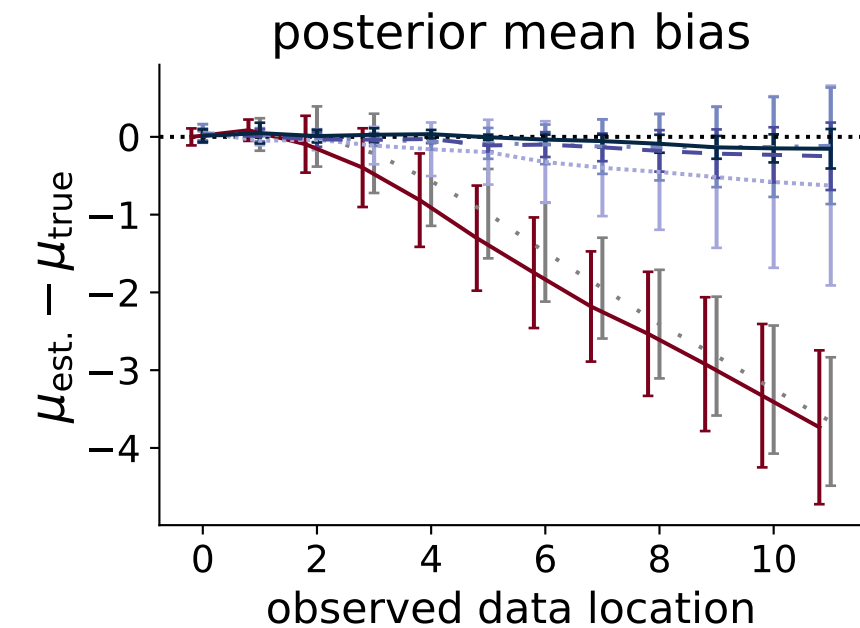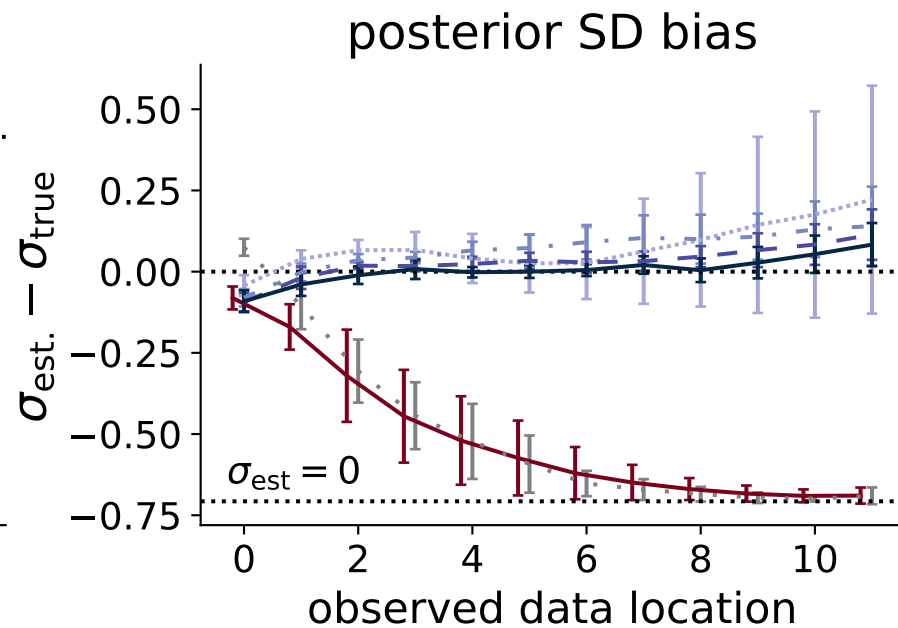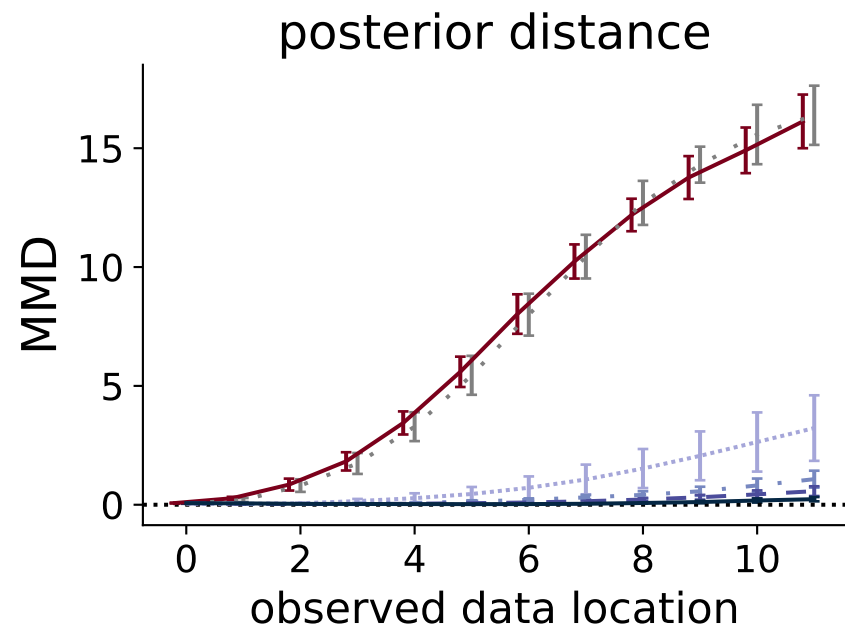

dataset mean    no SC    0    1    2    3    5

Supplement: supplementary_material [file posterior_metric_plot.pdf › self-consistency-real-main-2/experiments/multivariate_normal/dataset_means/plots/posterior_metric_plot.pdf]

# Size of the unlabeled training data

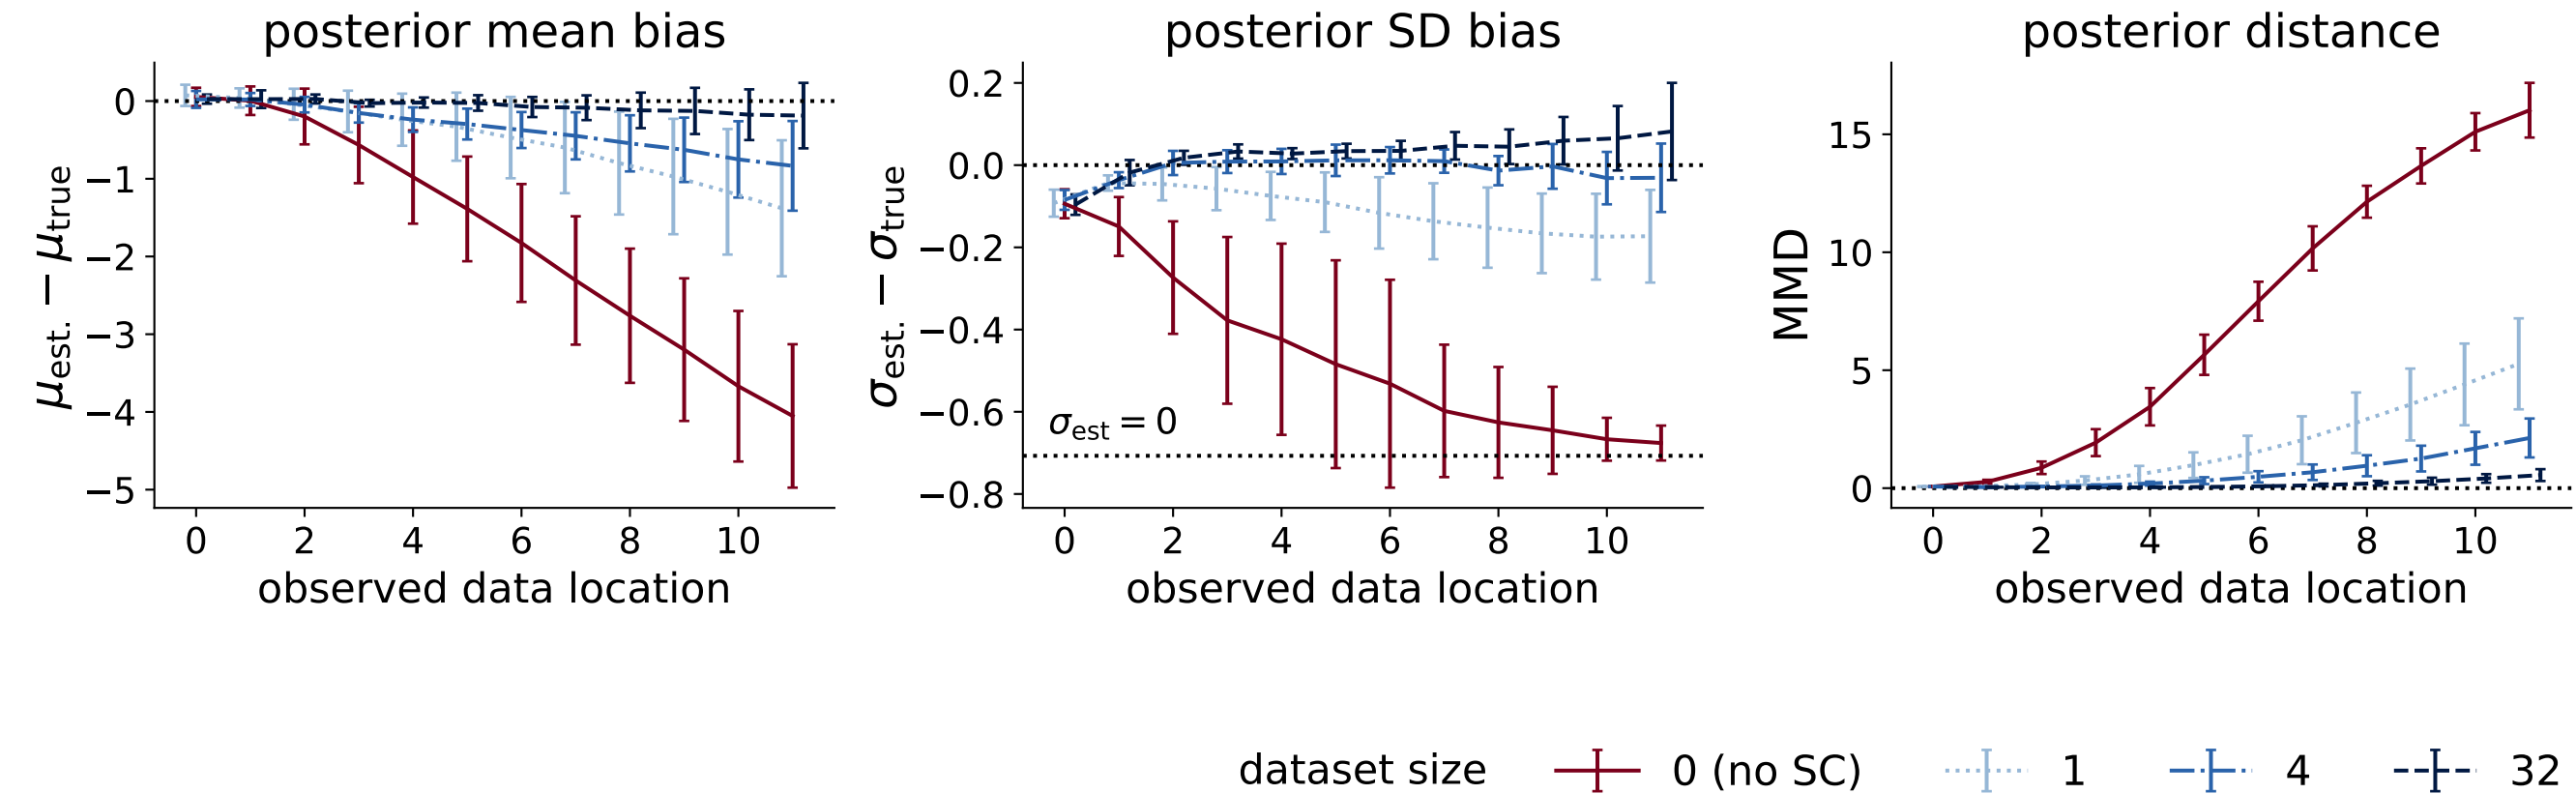

Supplement: supplementary_material [file posterior_metric_plot.pdf › self-consistency-real-main-2/experiments/multivariate_normal/dataset_size/plots/posterior_metric_plot.pdf]

# Likelihood function

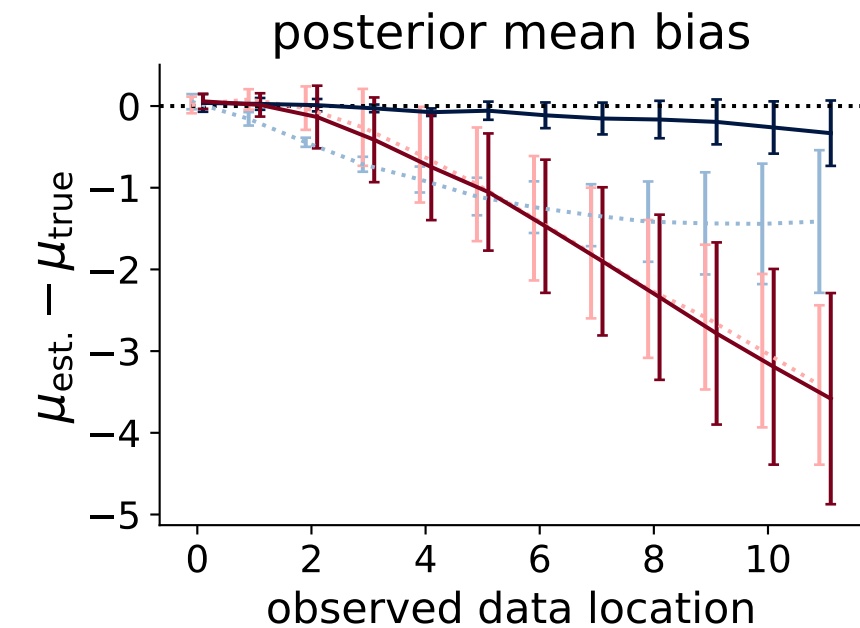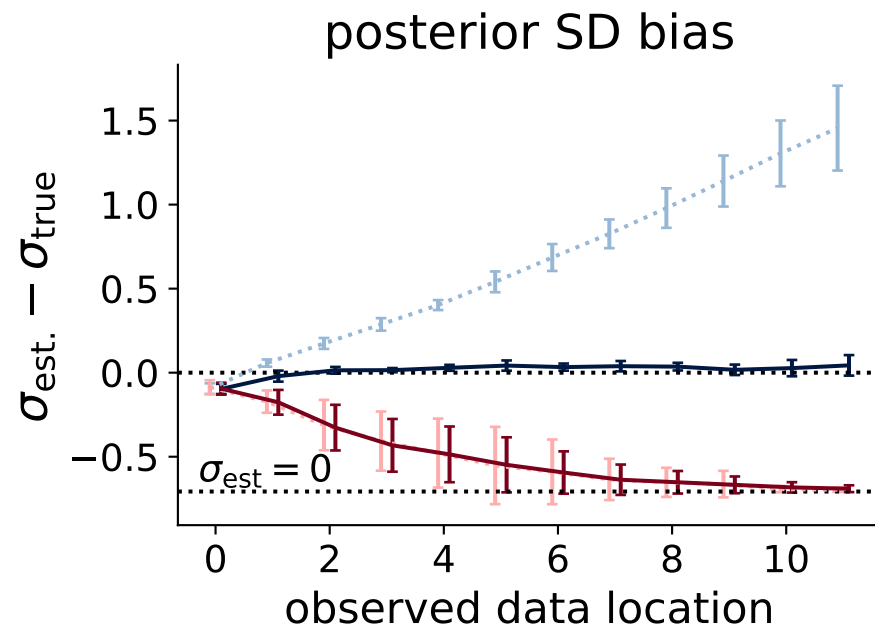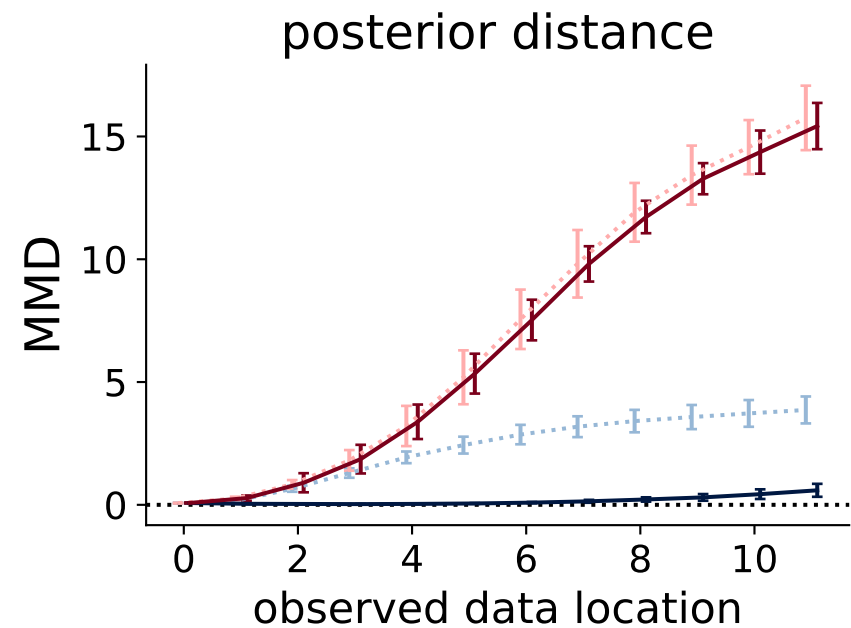

likelihood

|  |                   |  |                  |
|--|-------------------|--|------------------|
|  | estimated         |  | analytic         |
|  | estimated (no SC) |  | analytic (no SC) |

Supplement: supplementary_material [file posterior_metric_plot.pdf › self-consistency-real-main-2/experiments/multivariate_normal/estimated_likelihood/plots/posterior_metric_plot.pdf]

# Parameter dimensionality

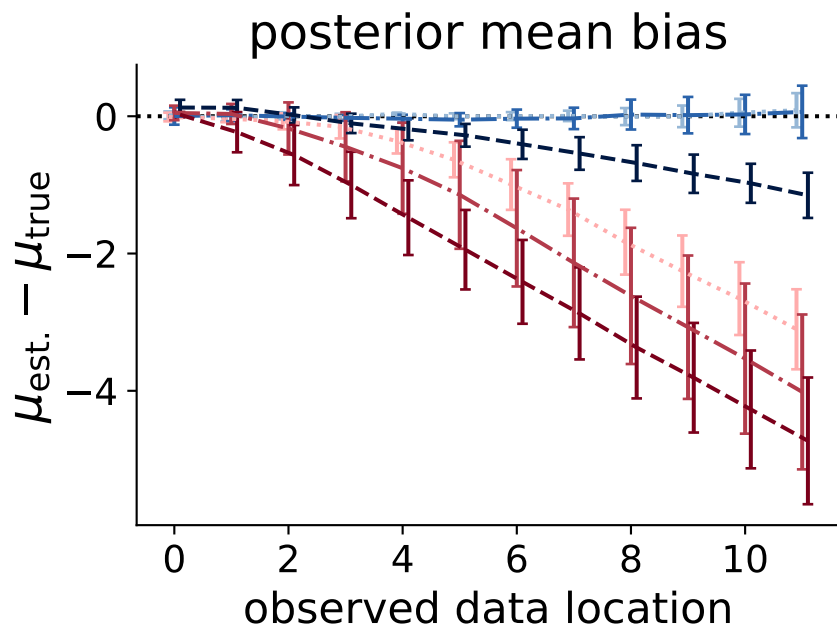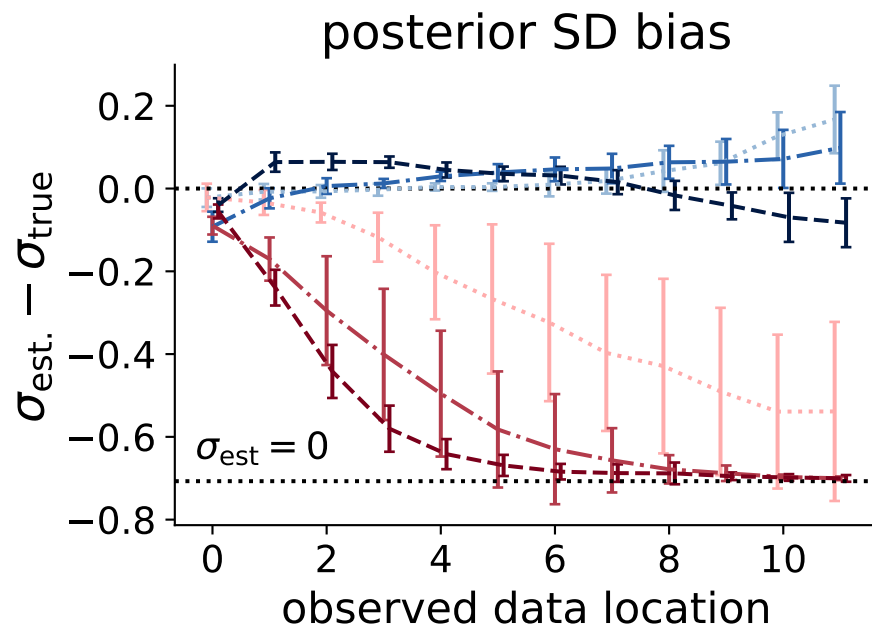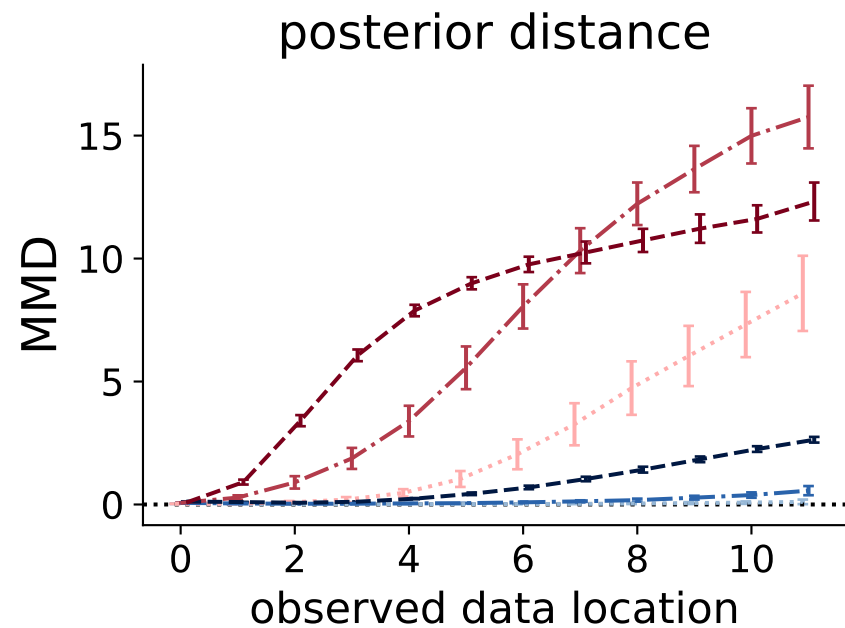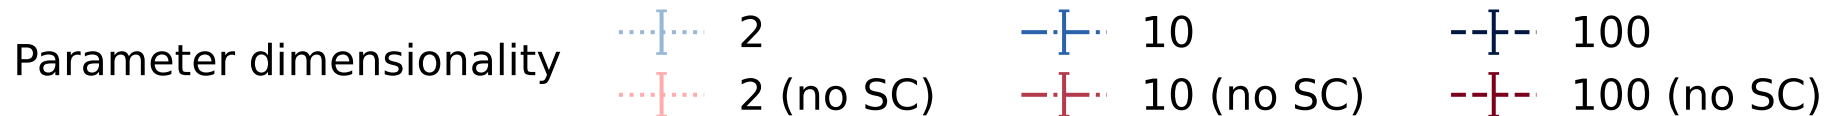

Supplement: supplementary_material [file posterior_metric_plot.pdf › self-consistency-real-main-2/experiments/multivariate_normal/parameter_dimensionality/plots/posterior_metric_plot.pdf]

# Summary network

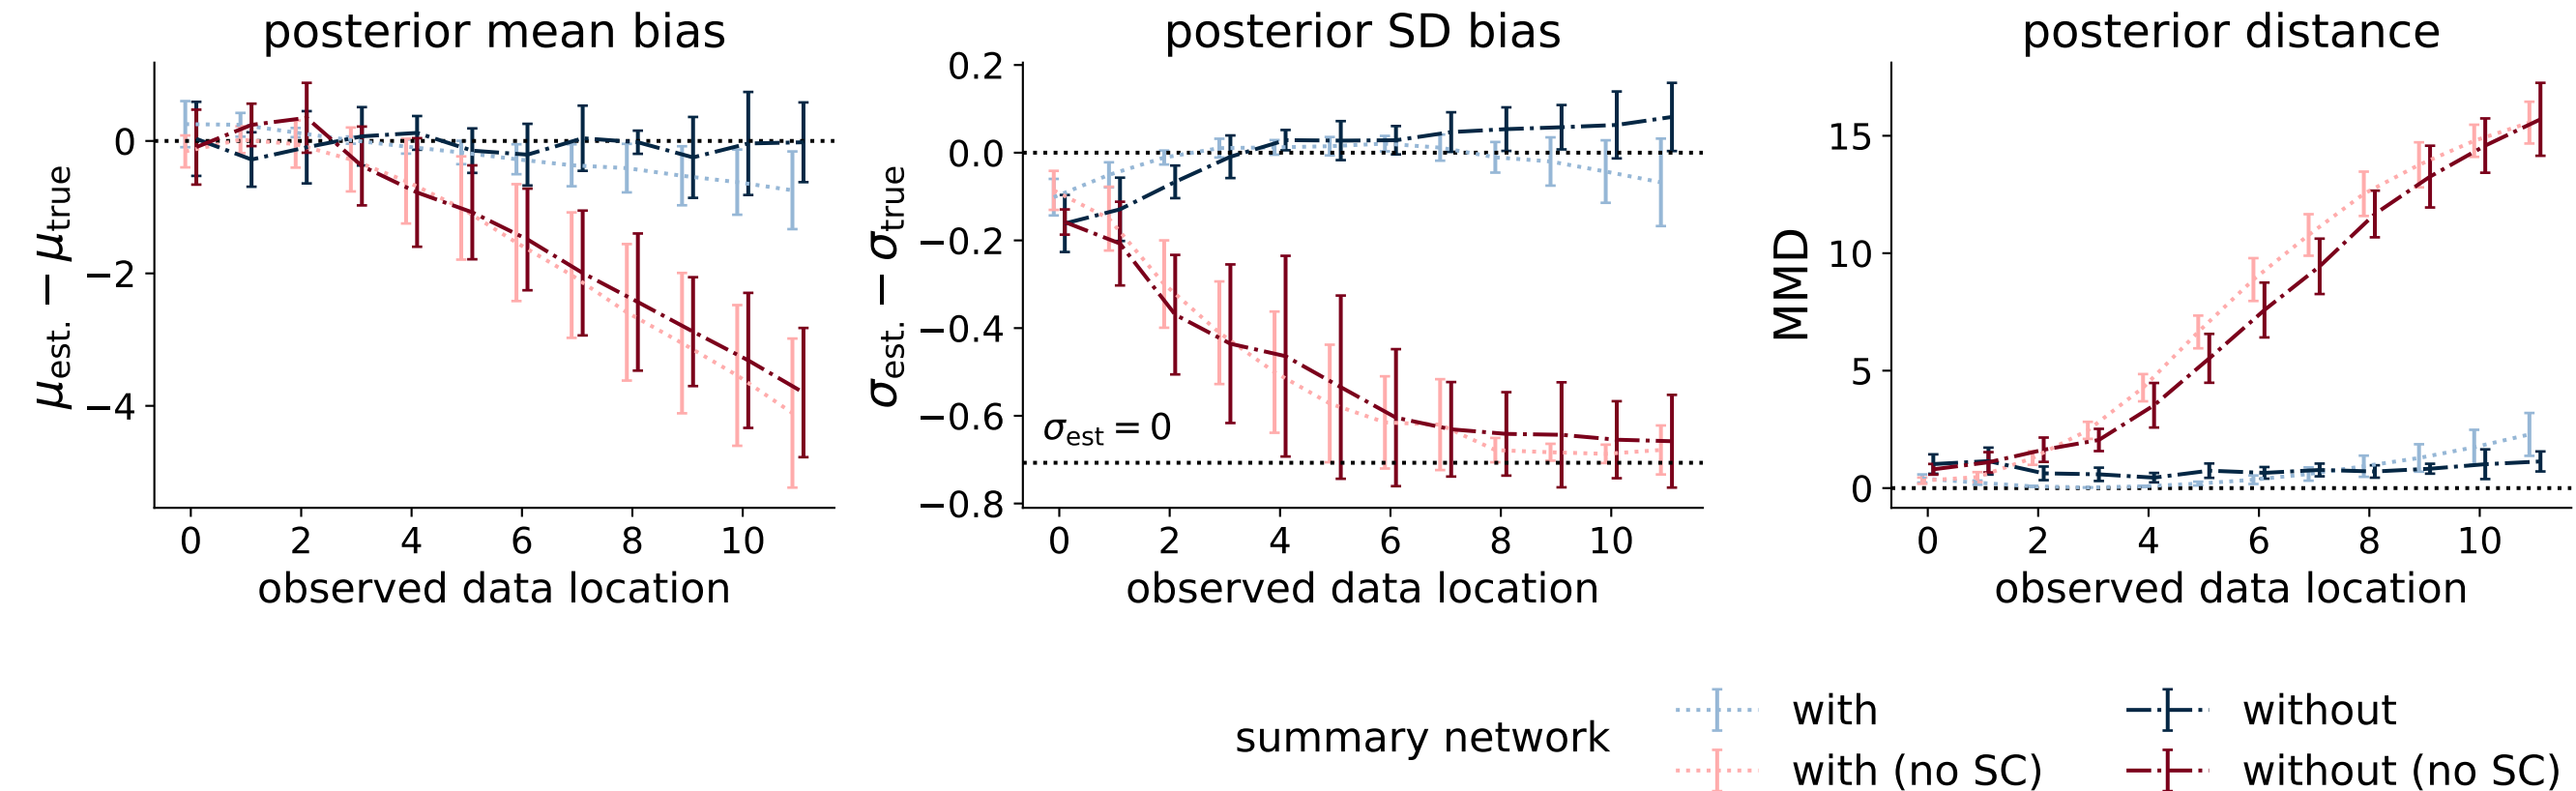

Supplement: supplementary_material [file posterior_metric_plot.pdf › self-consistency-real-main-2/experiments/multivariate_normal/summary_network/plots/posterior_metric_plot.pdf]
